# Supplementary material for: Postprandial Micronutrient Variability and Bioavailability: An Interventional Meal Study in Young vs. Old Participants
Source: MDPI journal article supplement (doi:10.3390/nu16050625), 2024-02-23
Supplement: s1 [file s1]

### Supplemental Figure S1

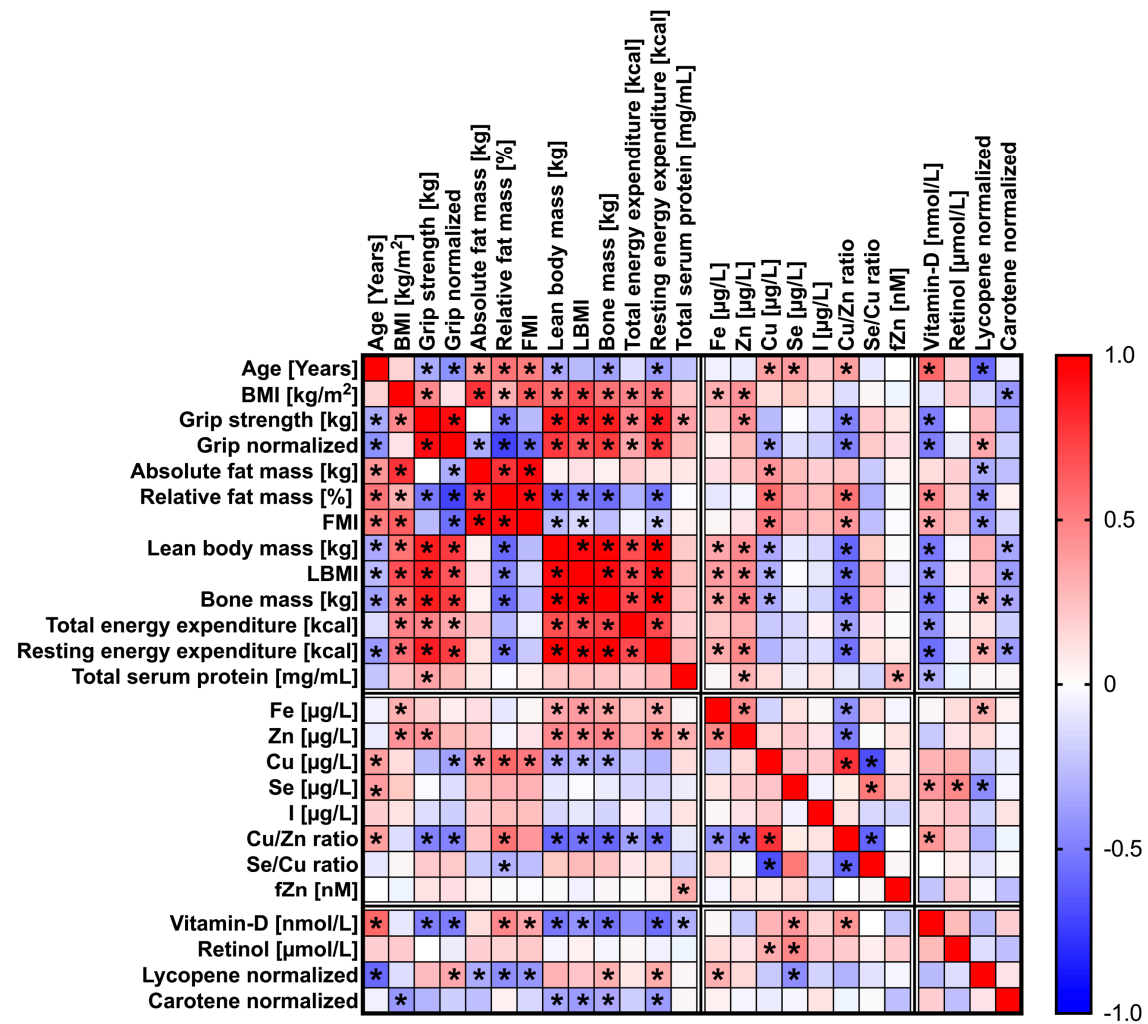

**Figure S1.** Correlation matrix for parameters, investigated within the Biomiel study. Positive associations are indicated in red. The blue color indicates negative associations. Significant correlations are marked by an asterisk ( $p < 0.05$ ).

## Supplemental Figure S2

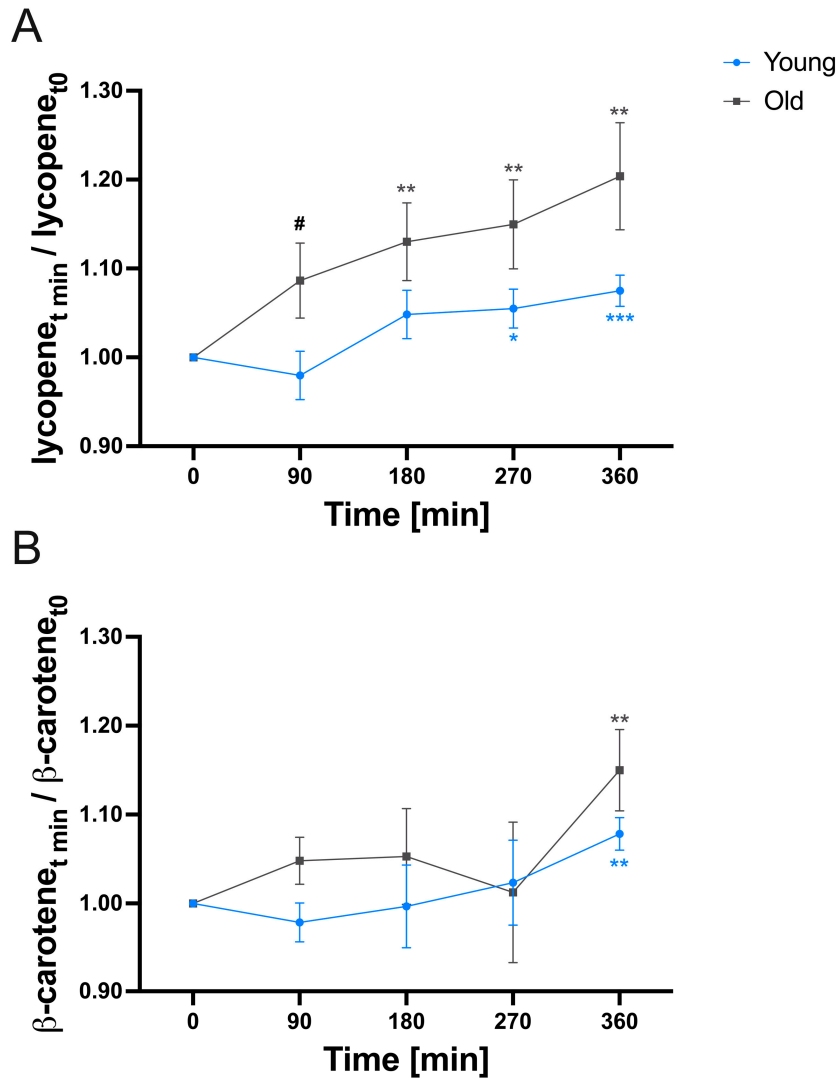

**Figure S2.** Postprandial progression curves of (A) lycopene and (B)  $\beta$ -carotene plasma concentrations throughout 360 min after consumption of a carotenoid-enriched supplement within the young (blue) and old (gray) study groups. Shown are the mean ( $\pm$  SEM) ratios of the serum concentrations between each observed timepoint and baseline to reflect postprandial variability. Significant time-dependent differences are marked with  $p < 0.05$  (\*);  $p < 0.01$  (\*\*);  $p < 0.001$  (\*\*\*). Significant differences that were age-related are marked with  $p < 0.05$  (#). Calculations for significance were performed using repeated measurement two-way ANOVA followed by Fisher's LSD post-hoc test.

**Exclusion criteria:**

- Type 1 or type 2 diabetes
- Obesity (BMI  $\geq 30$  kg/m<sup>2</sup>)
- Underweight (BMI  $< 19$  kg/m<sup>2</sup>)
- Regular intake of dietary supplements (multivitamins, carotenoids, trace elements) if subjects were not willing to abstain from them 3 days before intervention
- active smoking ( $\geq 4$  cigarettes/day)
- Chronic diseases that affect gastrointestinal function
- pregnancy, lactation
- acute, active upper or lower respiratory tract infection
- drastic, unwanted weight loss ( $>5\%$  in the last 6 months)
- (severe) food intolerances/allergies to tomatoes, carrots, herbs, soy, seafood/algae, gluten, nuts
- dementia
- self-reported severe/active diseases of the liver, kidney, rheumatic diseases and malignant tumors
- self-reported elevated blood fat levels (hyperlipidemia)
- Medications that influence fat absorption/metabolism/fat transport
- cardiac pacemakers

## Supplemental Table S1

**Table S1.** Ingredients and quantities for the test meal.

| Component           | Ingredient                       | Quantity per portion |
|---------------------|----------------------------------|----------------------|
| Bread Spread (30 g) | Mineral water non-carbonated     | 11.3 g (37.5 %)      |
|                     | Carrots (hot air-fried)          | 4.5 g (15.0 %)       |
|                     | Tomatoes (dried)                 | 3.8 g (12.5 %)       |
|                     | Rapeseed oil                     | 3.0 g (10.0 %)       |
|                     | Sunflower seed paste             | 1.8 g (6.0 %)        |
|                     | Hokkaido pumpkin (hot air-fried) | 1.5 g (5.0 %)        |
|                     | Wheat germ                       | 1.4 g (4.5 %)        |
|                     | Frozen chopped parsley           | 1.2 g (4.0 %)        |
|                     | Frozen chopped chives            | 0.6 g (2.0 %)        |
|                     | Sea buckthorn oil                | 0.6 g (2.0 %)        |
|                     | Brazil nut                       | 0.3 g (1.0 %)        |
|                     | Table salt                       | 0.1 g (0.3 %)        |
| Smoothie (500 g)    | Blackcurrant juice               | 130 g (26.0 %)       |
|                     | Apple juice                      | 130 g (26.0 %)       |
|                     | Carrot juice                     | 63.0 g (12.6 %)      |
|                     | Cucumber                         | 58.0 g (11.6 %)      |
|                     | Tomato juice                     | 31.0 g (6.2 %)       |
|                     | Spinach, fresh                   | 31.0 g (6.2 %)       |
|                     | Sunflower seeds                  | 22.5 g (4.5 %)       |
|                     | Wheat germ                       | 13.5 g (2.7 %)       |
|                     | Parsley, fresh                   | 8.0 g (1.6 %)        |
|                     | Sea buckthorn juice              | 7.5 g (1.5 %)        |
|                     | Lemon juice                      | 6.0 g (1.2 %)        |

## Supplemental Table S2

**Table S2.** Trace element concentrations for the test meal components and corresponding percentage proportions of the DRI according to the German Nutrition Society.

| Food item         | Fe [mg]     |                          | Zn [mg]     |                          | Cu [mg]     |                    | Se [µg] |                          |
|-------------------|-------------|--------------------------|-------------|--------------------------|-------------|--------------------|---------|--------------------------|
|                   | Per serving | % DRI <sup>a</sup> m   f | Per serving | % DRI <sup>b</sup> m   f | Per serving | % DRI <sup>c</sup> | serving | % DRI <sup>d</sup> m   f |
| Margarine, 20 g   | 0.012       | 0.12   0.08              | 0.032       | 0.23   0.40              | 0.008       | 0.53               | NDA     | NDA                      |
| Wheat toast, 72 g | 0.832       | 8.32   5.55              | 0.706       | 5.04   8.83              | 0.135       | 9.00               | 0.936   | 1.34   1.56              |
| Smoothie, 500 g   | 2.466       | 24.7   16.4              | 2.989       | 21.4   37.4              | 0.360       | 24.0               | 14.6    | 20.9   24.3              |
| Spread, 30 g      | 0.410       | 4.10   2.73              | 0.498       | 3.56   6.23              | 0.093       | 6.20               | 1.29    | 1.84   2.15              |
| Sum               | 3.720       | 37.2   24.8              | 4.225       | 30.2   52.8              | 0.596       | 39.7               | 16.8    | 24.0   28.0              |

DRI: daily recommended intake; NDA: no data available

<sup>a</sup>male: 10 mg/d; female: 15 mg/d

<sup>b</sup>male: 14 mg/d; female: 8 mg/d (corresponds to recommendation for medium (660 mg/d) phytate intake)

<sup>c</sup>male/female: 1.5 mg/d

<sup>d</sup>male: 70 µg/d; female: 60 µg/d

## Supplemental Table S3

**Table S3.** Sex-specific differences in examined parameters provided as mean  $\pm$  SD.

|                                                                              | young<br>male         | old<br>male           | young<br>female       | old<br>female         | young<br>vs. old<br>(male) | young vs.<br>old<br>(female) | sex-specific<br>differences<br>(young) | sex-specific<br>differences<br>(old) |
|------------------------------------------------------------------------------|-----------------------|-----------------------|-----------------------|-----------------------|----------------------------|------------------------------|----------------------------------------|--------------------------------------|
| <b>Fe</b> [ $\mu\text{g/L}$ ]                                                | 1568.0 $\pm$<br>658.0 | 1677.0 $\pm$<br>255.9 | 1173.0 $\pm$<br>430.8 | 1288.0 $\pm$<br>351.8 | ns                         | ns                           | ns                                     | ns                                   |
| <b>Cu</b> [ $\mu\text{g/L}$ ]                                                | 757.8 $\pm$<br>153.7  | 845.4 $\pm$<br>84.1   | 822.1 $\pm$<br>203.9  | 918.7 $\pm$<br>104.1  | ns                         | ns                           | ns                                     | ns                                   |
| <b>Zn</b> [ $\mu\text{g/L}$ ]                                                | 805.6 $\pm$<br>30.7   | 720.0 $\pm$<br>72.4   | 686.4 $\pm$<br>70.5   | 657.2 $\pm$<br>51.99  | *                          | ns                           | ***                                    | ns                                   |
| <b>Se</b> [ $\mu\text{g/L}$ ]                                                | 74.47 $\pm$<br>6.78   | 73.31 $\pm$<br>9.88   | 66.34 $\pm$<br>13.50  | 80.49 $\pm$<br>11.07  | ns                         | *                            | ns                                     | ns                                   |
| <b>I</b> [ $\mu\text{g/L}$ ]                                                 | 55.56 $\pm$<br>9.46   | 56.33 $\pm$<br>5.50   | 54.52 $\pm$<br>8.05   | 57.33 $\pm$<br>9.33   | ns                         | ns                           | ns                                     | ns                                   |
| <b>Cu/Zn ratio</b>                                                           | 0.98 $\pm$<br>0.22    | 1.19 $\pm$<br>0.18    | 1.20 $\pm$<br>0.31    | 1.37 $\pm$<br>0.18    | ns                         | ns                           | ns                                     | ns                                   |
| <b>Se/Cu ratio</b>                                                           | 0.097 $\pm$<br>0.023  | 0.088 $\pm$<br>0.016  | 0.086 $\pm$<br>0.030  | 0.088 $\pm$<br>0.014  | ns                         | ns                           | ns                                     | ns                                   |
| <b>fZn</b> [nM]                                                              | 0.57 $\pm$<br>0.13    | 0.74 $\pm$<br>0.20    | 0.68 $\pm$<br>0.15    | 0.59 $\pm$<br>0.14    | ns                         | ns                           | ns                                     | ns                                   |
| <b>retinol</b><br>[ $\mu\text{mol/L}$ ]                                      | 1.463 $\pm$<br>0.150  | 1.572 $\pm$<br>0.366  | 1.382 $\pm$<br>0.322  | 1.542 $\pm$<br>0.284  | ns                         | ns                           | ns                                     | ns                                   |
| <b>vitamin D</b><br>[nmol/L]                                                 | 65.38 $\pm$<br>25.48  | 81.51 $\pm$<br>21.45  | 72.05 $\pm$<br>28.62  | 139.9 $\pm$<br>46.86  | ns                         | ***                          | ns                                     | **                                   |
| <b>vitamin C</b><br>[mmol/L]                                                 | 0.190 $\pm$<br>0.105  | 0.204 $\pm$<br>0.198  | 0.664 $\pm$<br>0.804  | 0.278 $\pm$<br>0.202  | ns                         | ns                           | ns                                     | ns                                   |
| <b>lycopene</b><br>[ $\mu\text{mol/mmol}$<br>cholesterol]                    | 0.173 $\pm$<br>0.037  | 0.126 $\pm$<br>0.033  | 0.159 $\pm$<br>0.055  | 0.107 $\pm$<br>0.025  | ns                         | ns                           | ns                                     | **                                   |
| <b><math>\beta</math>-carotene</b><br>[ $\mu\text{mol/mmol}$<br>cholesterol] | 0.103 $\pm$<br>0.040  | 0.071 $\pm$<br>0.027  | 0.542 $\pm$<br>0.271  | 0.147 $\pm$<br>0.056  | ns                         | ***                          | ***                                    | ns                                   |

Statistical analyses by ordinary one-way ANOVA with Tukey's multiple comparisons;  $p < 0.05$  (\*);  $p < 0.01$  (\*\*);  $p < 0.001$  (\*\*\*)
